# Supplementary material for: Memory CD8 T Cells Generated by Cytomegalovirus Vaccine Vector Expressing NKG2D Ligand Have Effector-Like Phenotype and Distinct Functional Features
Source: Front Immunol. 2021 Jun 3;12:681380. doi: 10.3389/fimmu.2021.681380 (PMC8218728; doi:10.3389/fimmu.2021.681380)
Supplement: Supplementary file 2 [file Table_1.xlsx]

## Sheet: Table S1
Table S1. List od differentially expressed genes between OT-1 cells primed with MCMV-SIINFEKL (WT) and RAE-1γMCMV-SIINFEKL (RAE)
GeneID	baseMean	log2FoldChange	lfcSE	stat	pvalue	padj	WT1	WT2	WT3	RAE1	RAE2	RAE3	GeneName	Description	MouseEntrezID	HumanEntrezGeneID	HumanGeneName
ENSMUSG00000014846	1332.38	3.34774	0.276053	12.1272	7.58e-34	1.2e-29	194.893	262.371	257.969	3104.83	1309.65	2864.6	Tppp3	tubulin polymerization-promoting protein family member 3	67971	51673	TPPP3
ENSMUSG00000025930	1131.42	2.2746	0.261894	8.6852	3.78e-18	2.98e-14	321.621	521.085	319.279	2416.39	1230.97	1979.2	Msc	musculin	17681	9242	MSC
ENSMUSG00000039813	315.42	1.85882	0.225943	8.22692	1.92e-16	1.01e-12	152.65	123.415	133.033	572.259	387.418	523.743	Tbc1d2	TBC1 domain family, member 2	381605	55357	TBC1D2
ENSMUSG00000004032	71.6885	3.25908	0.403681	8.07341	6.84e-16	2.7e-12	7.68051	20.112	12.7249	159.2	113.536	116.877	Gstm5	glutathione S-transferase, mu 5	14866	2947	GSTM3
ENSMUSG00000029343	172.61	2.00503	0.268264	7.47406	7.78e-14	2.45e-10	81.6055	61.2503	63.6245	320.121	209.146	299.912	Crybb1	crystallin, beta B1	12960	1414	CRYBB1
ENSMUSG00000014599	202.935	2.3728	0.334702	7.08928	1.35e-12	3.55e-09	72.0048	80.4481	43.9588	460.388	189.227	371.582	Csf1	colony stimulating factor 1 (macrophage)	12977	1435	CSF1
ENSMUSG00000097767	478.436	1.54905	0.224586	6.89736	5.3e-12	1.19e-08	259.217	194.721	277.634	650.568	597.559	890.914	Miat	myocardial infarction associated transcript (non-protein coding)	NA	NA	NA
ENSMUSG00000037944	1799.34	-1.07323	0.159419	-6.73214	1.67e-11	3.3e-08	2476.97	2462.81	2377.24	1061.04	1091.54	1326.45	Ccr7	chemokine (C-C motif) receptor 7	12775	1236	CCR7
ENSMUSG00000026581	3776.05	-1.22969	0.18334	-6.70715	1.98e-11	3.48e-08	5442.6	6182.62	4257.06	1973.22	2480.87	2319.91	Sell	selectin, lymphocyte	20343	6402	SELL
ENSMUSG00000068566	1019.66	1.48863	0.224959	6.61733	3.66e-11	5.77e-08	635.562	465.319	506.683	1930.19	1100.51	1479.71	Myadm	myeloid-associated differentiation marker	50918	91663	MYADM
ENSMUSG00000007021	92.3923	2.29137	0.347475	6.59435	4.27e-11	6.13e-08	38.4026	31.0822	24.293	199.645	106.565	154.366	Syngr3	synaptogyrin 3	20974	NA	NA
ENSMUSG00000025461	150.205	2.05655	0.318651	6.45393	1.09e-10	1.43e-07	48.0032	73.1347	53.2132	275.373	149.39	302.117	Cd163l1	CD163 molecule-like 1	244233	NA	NA
ENSMUSG00000025473	415.469	1.71686	0.274037	6.26507	3.73e-10	4.52e-07	257.297	174.609	149.228	857.958	446.178	607.542	Adam8	a disintegrin and metallopeptidase domain 8	11501	101	ADAM8
ENSMUSG00000037706	57.5553	4.12486	0.660872	6.24155	4.33e-10	4.88e-07	10.5607	4.57092	3.47043	234.927	48.8007	43.0021	Cd81	CD81 antigen	12520	975	CD81
ENSMUSG00000035638	57.8952	2.8399	0.455804	6.23053	4.65e-10	4.89e-07	16.3211	14.6269	11.5681	154.897	92.6217	57.3361	Muc20	mucin 20	224116	200958	MUC20
ENSMUSG00000087651	575.336	1.6916	0.273502	6.18497	6.21e-10	6.13e-07	270.738	240.43	305.398	1136.77	491.991	1006.69	1500009L16Rik	RIKEN cDNA 1500009L16 gene	69784	387882	C12orf75
ENSMUSG00000050335	12168.6	1.20909	0.196268	6.16043	7.25e-10	6.74e-07	8282.47	6821.64	6940.86	19927.5	12473.1	18565.9	Lgals3	lectin, galactose binding, soluble 3	16854	3958	LGALS3
ENSMUSG00000074170	582.157	1.17272	0.192413	6.0948	1.1e-09	9.61e-07	418.588	295.281	359.768	861.4	741.97	815.936	Plekhf1	pleckstrin homology domain containing, family F (with FYVE domain) member 1	72287	79156	PLEKHF1
ENSMUSG00000001020	2214.77	1.0249	0.169682	6.04008	1.54e-09	1.28e-06	1613.87	1321	1443.7	2961.98	2578.47	3369.6	S100a4	S100 calcium binding protein A4	20198	6275	S100A4
ENSMUSG00000037279	21.6019	7.86925	1.3225	5.95026	2.68e-09	2.11e-06	0	0	0	57.6561	17.9268	54.0282	Ovol2	ovo like zinc finger 2	107586	58495	OVOL2
ENSMUSG00000022034	69.954	2.65788	0.447988	5.93293	2.98e-09	2.24e-06	24.9617	11.8844	20.8226	182.434	62.7437	116.877	Esco2	establishment of sister chromatid cohesion N-acetyltransferase 2	71988	157570	ESCO2
ENSMUSG00000028661	20.8806	7.8236	1.32437	5.90741	3.48e-09	2.49e-06	0	0	0	67.9826	20.9146	36.3864	Epha8	Eph receptor A8	13842	2046	EPHA8
ENSMUSG00000029223	22.9966	4.4576	0.759115	5.8721	4.3e-09	2.95e-06	1.92013	1.82837	2.31362	52.4929	40.8332	38.5916	Uchl1	ubiquitin carboxy-terminal hydrolase L1	22223	7345	UCHL1
ENSMUSG00000058773	108.423	2.42817	0.420701	5.77174	7.85e-09	5.16e-06	59.524	20.112	21.9794	203.087	106.565	239.268	H1f5	H1.5 linker histone, cluster member	56702	3009	H1-5
ENSMUSG00000038807	1352.04	1.08025	0.190986	5.65616	1.55e-08	9.77e-06	986.946	671.011	947.427	1858.76	1651.26	1996.84	Rap1gap2	RAP1 GTPase activating protein 2	380711	23108	RAP1GAP2
ENSMUSG00000054493	45.7933	2.69679	0.478233	5.63907	1.71e-08	1.04e-05	19.2013	9.14183	8.09767	72.2853	55.7722	110.262	Gm9947	predicted gene 9947	NA	NA	NA
ENSMUSG00000019942	441	1.51639	0.26936	5.6296	1.81e-08	1.06e-05	264.018	226.718	194.344	829.56	390.405	740.959	Cdk1	cyclin-dependent kinase 1	12534	983	CDK1
ENSMUSG00000113634	210.504	1.25809	0.224802	5.59645	2.19e-08	1.23e-05	106.567	136.213	129.563	294.304	268.902	327.477	Gm36756	predicted gene, 36756	NA	NA	NA
ENSMUSG00000023505	364.21	1.86762	0.338088	5.52408	3.31e-08	1.69e-05	259.217	114.273	96.0152	719.411	374.471	621.876	Cdca3	cell division cycle associated 3	14793	83461	CDCA3
ENSMUSG00000027238	28.9811	3.33869	0.603412	5.53301	3.15e-08	1.69e-05	3.84026	9.14183	2.31362	65.401	35.8536	57.3361	Frmd5	FERM domain containing 5	228564	84978	FRMD5
ENSMUSG00000086968	44.4749	2.40414	0.435237	5.52374	3.32e-08	1.69e-05	15.361	10.056	17.3521	92.9382	72.7031	58.4387	4933431E20Rik	RIKEN cDNA 4933431E20 gene	NA	NA	NA
ENSMUSG00000024501	70.6862	2.29484	0.417678	5.49429	3.92e-08	1.93e-05	31.6821	12.7986	27.7634	167.805	103.577	80.491	Dpysl3	dihydropyrimidinase-like 3	22240	1809	DPYSL3
ENSMUSG00000062380	130.165	1.90961	0.349193	5.46865	4.53e-08	2.17e-05	71.0447	41.1383	52.0564	260.743	114.532	241.473	Tubb3	tubulin, beta 3 class III	22152	10381	TUBB3
ENSMUSG00000028873	321.751	1.72176	0.317246	5.4272	5.72e-08	2.66e-05	204.494	134.385	109.897	672.081	274.877	534.769	Cdca8	cell division cycle associated 8	52276	55143	CDCA8
ENSMUSG00000027469	125.743	2.49199	0.460402	5.41265	6.21e-08	2.8e-05	65.2844	27.4255	20.8226	308.073	83.6583	249.191	Tpx2	TPX2, microtubule-associated	72119	22974	TPX2
ENSMUSG00000018983	742.374	1.41943	0.272115	5.2163	1.83e-07	8e-05	565.478	243.173	403.727	1216.8	827.62	1197.44	E2f2	E2F transcription factor 2	242705	1870	E2F2
ENSMUSG00000066026	23.0781	3.71592	0.714239	5.20263	1.96e-07	8.38e-05	7.68051	1.82837	0	47.3297	40.8332	40.7968	Dhrs3	dehydrogenase/reductase (SDR family) member 3	20148	9249	DHRS3
ENSMUSG00000048416	60.7857	2.14996	0.417161	5.15379	2.55e-07	0.000106031	24.0016	31.9964	10.4113	118.754	73.699	105.851	Mlf1	myeloid leukemia factor 1	17349	4291	MLF1
ENSMUSG00000028044	565.805	1.33251	0.260981	5.10576	3.29e-07	0.000130005	399.387	262.371	303.084	943.151	509.917	976.919	Cks1b	CDC28 protein kinase 1b	54124	1163	CKS1B
ENSMUSG00000041431	85.6434	2.02942	0.397189	5.10945	3.23e-07	0.000130005	44.163	24.683	32.3907	194.482	73.699	144.443	Ccnb1	cyclin B1	268697	891	CCNB1
ENSMUSG00000046733	25.7995	3.4566	0.677633	5.101	3.38e-07	0.000130072	9.60064	0.914183	2.31362	55.0745	32.8658	54.0282	Gprc5a	G protein-coupled receptor, family C, group 5, member A	232431	9052	GPRC5A
ENSMUSG00000002204	153.315	1.56318	0.308557	5.06611	4.06e-07	0.000152167	114.248	65.8212	52.0564	271.93	194.207	221.626	Napsa	napsin A aspartic peptidase	16541	9476	NAPSA
ENSMUSG00000031155	2448.96	-0.773117	0.152857	-5.05777	4.24e-07	0.000152167	3420.71	2957.38	2890.87	1699.56	1857.41	1867.83	Pim2	proviral integration site 2	18715	11040	PIM2
ENSMUSG00000042190	143.977	1.30498	0.257991	5.05823	4.23e-07	0.000152167	93.1262	76.7914	78.6631	184.155	185.243	245.884	Cmklr1	chemokine-like receptor 1	14747	1240	CMKLR1
ENSMUSG00000020330	51.8961	3.00946	0.596841	5.04231	4.6e-07	0.000161326	24.9617	4.57092	4.62724	128.22	39.8373	109.159	Hmmr	hyaluronan mediated motility receptor (RHAMM)	15366	3161	HMMR
ENSMUSG00000001517	70.1832	2.1895	0.435657	5.02575	5.01e-07	0.000172066	40.3227	10.056	25.4498	111.87	85.6502	147.751	Foxm1	forkhead box M1	14235	2305	FOXM1
ENSMUSG00000036223	54.1129	2.49462	0.501077	4.97852	6.41e-07	0.000215173	23.0415	17.3695	8.09767	108.428	39.8373	127.904	Ska1	spindle and kinetochore associated complex subunit 1	66468	220134	SKA1
ENSMUSG00000052336	6754.82	0.762934	0.154338	4.94328	7.68e-07	0.000252605	5154.58	4864.37	5008.99	9249.94	7312.14	8938.91	Cx3cr1	chemokine (C-X3-C motif) receptor 1	13051	1524	CX3CR1
ENSMUSG00000069272	164.804	1.66855	0.337847	4.93876	7.86e-07	0.000253252	96.9665	76.7914	62.4677	284.838	131.463	336.298	H2ac8	H2A clustered histone 8	319166	NA	NA
ENSMUSG00000028832	1528.45	1.14378	0.231982	4.93047	8.2e-07	0.000258953	1148.24	933.381	775.062	2426.72	1425.18	2462.14	Stmn1	stathmin 1	16765	3925	STMN1
ENSMUSG00000030793	5117.81	0.761661	0.15643	4.86901	1.12e-06	0.000347121	3792.25	3986.75	3612.72	6836.98	5539.38	6938.77	Pycard	PYD and CARD domain containing	66824	29108	PYCARD
ENSMUSG00000030208	513.496	0.969442	0.199284	4.86462	1.15e-06	0.000348096	357.144	280.654	404.883	750.39	627.437	660.467	Emp1	epithelial membrane protein 1	13730	2012	EMP1
ENSMUSG00000025804	26.6315	3.5798	0.737705	4.85262	1.22e-06	0.000362864	0	4.57092	8.09767	76.588	20.9146	49.6178	Ccr1	chemokine (C-C motif) receptor 1	12768	1230	CCR1
ENSMUSG00000023940	68.9107	1.78239	0.369333	4.82597	1.39e-06	0.000407236	43.2029	31.9964	17.3521	117.033	93.6176	110.262	Sgo1	shugoshin 1	72415	151648	SGO1
ENSMUSG00000030677	493.138	1.46778	0.305367	4.80662	1.54e-06	0.000440535	397.467	185.579	202.442	940.569	473.068	759.703	Kif22	kinesin family member 22	110033	3835	KIF22
ENSMUSG00000018012	77.3936	1.5891	0.331041	4.8003	1.58e-06	0.000446543	28.8019	35.6532	52.0564	127.36	113.536	106.954	Rac3	Rac family small GTPase 3	170758	5881	RAC3
ENSMUSG00000033998	11.8469	7.0088	1.46642	4.77953	1.76e-06	0.000486542	0	0	0	50.7718	5.97559	14.334	Kcnk1	potassium channel, subfamily K, member 1	16525	3775	KCNK1
ENSMUSG00000028063	1680.31	1.14621	0.241496	4.74628	2.07e-06	0.000562711	1194.32	840.135	1103.6	2939.6	1486.93	2517.27	Lmna	lamin A	16905	4000	LMNA
ENSMUSG00000048922	101.32	1.69249	0.356823	4.74323	2.1e-06	0.000562711	68.1646	49.3659	25.4498	180.713	115.528	168.7	Cdca2	cell division cycle associated 2	108912	157313	CDCA2
ENSMUSG00000074476	213.85	1.57955	0.335776	4.70416	2.55e-06	0.000670591	155.53	62.1645	104.113	375.195	200.182	385.916	Spc24	SPC24, NDC80 kinetochore complex component, homolog (S. cerevisiae)	67629	147841	SPC24
ENSMUSG00000033213	262.709	1.2221	0.26233	4.65862	3.18e-06	0.000823705	192.973	154.497	124.935	414.78	257.946	431.123	AA467197	expressed sequence AA467197	433470	84419	C15orf48
ENSMUSG00000036578	42.5834	2.25766	0.484985	4.65511	3.24e-06	0.000824342	12.4808	9.14183	23.1362	92.9382	42.8251	74.9779	Fxyd7	FXYD domain-containing ion transport regulator 7	57780	NA	NA
ENSMUSG00000017861	59.7032	2.10741	0.453309	4.64896	3.34e-06	0.000826242	37.4425	13.7128	16.1953	127.36	58.76	104.749	Mybl2	myeloblastosis oncogene-like 2	17865	4605	MYBL2
ENSMUSG00000102051	4671.28	0.993474	0.213738	4.64809	3.35e-06	0.000826242	2334.88	3921.85	3114.13	7540.9	5245.58	5870.33	Ly6a2	lymphocyte antigen 6 complex, locus A2	NA	NA	NA
ENSMUSG00000022346	1081.54	-0.828494	0.178921	-4.63051	3.65e-06	0.000879406	1557.22	1282.6	1310.67	656.591	827.62	854.528	Myc	myelocytomatosis oncogene	17869	4609	MYC
ENSMUSG00000026683	78.2152	2.22411	0.480814	4.62572	3.73e-06	0.000879406	46.0831	24.683	11.5681	196.203	61.7478	129.006	Nuf2	NUF2, NDC80 kinetochore complex component	66977	83540	NUF2
ENSMUSG00000035273	57.8879	2.06284	0.445711	4.6282	3.69e-06	0.000879406	25.9217	23.7688	17.3521	151.455	73.699	55.1308	Hpse	heparanase	15442	10855	HPSE
ENSMUSG00000021892	885.344	-0.731261	0.158302	-4.61939	3.85e-06	0.000880384	1095.43	1106.16	1114.01	687.571	699.145	609.747	Sh3bp5	SH3-domain binding protein 5 (BTK-associated)	24056	9467	SH3BP5
ENSMUSG00000040751	200.989	1.62241	0.351143	4.62038	3.83e-06	0.000880384	98.8866	89.59	107.583	474.157	142.418	293.296	Lat2	linker for activation of T cells family, member 2	56743	7462	LAT2
ENSMUSG00000023132	54530.3	1.30045	0.28199	4.6117	3.99e-06	0.000890954	20267.9	46350	27859.4	106061	54650.8	71993.2	Gzma	granzyme A	14938	3001	GZMA
ENSMUSG00000068101	98.6037	1.71944	0.372901	4.61098	4.01e-06	0.000890954	55.6837	39.3099	42.802	191.9	76.6868	185.24	Cenpm	centromere protein M	66570	79019	CENPM
ENSMUSG00000039131	37.1389	2.62557	0.570299	4.60386	4.15e-06	0.000902887	9.60064	10.9702	10.4113	48.1902	27.8861	115.775	Gipc2	GIPC PDZ domain containing family, member 2	54120	54810	GIPC2
ENSMUSG00000051212	3163.86	-0.80743	0.175435	-4.60244	4.18e-06	0.000902887	3389.03	4860.71	3830.2	2181.47	2436.05	2285.72	Gpr183	G protein-coupled receptor 183	321019	1880	GPR183
ENSMUSG00000032899	89.4617	1.79709	0.392328	4.58058	4.64e-06	0.000969635	24.0016	62.1645	33.5475	192.761	98.5973	125.698	Styk1	serine/threonine/tyrosine kinase 1	243659	55359	STYK1
ENSMUSG00000039542	13.1501	6.17812	1.34919	4.57915	4.67e-06	0.000969635	0	0.914183	0	33.561	27.8861	16.5393	Ncam1	neural cell adhesion molecule 1	17967	4684	NCAM1
ENSMUSG00000042489	90.7009	1.87305	0.408811	4.58171	4.61e-06	0.000969635	48.9633	38.3957	28.9202	133.384	70.7112	223.831	Clspn	claspin	269582	63967	CLSPN
ENSMUSG00000006356	682.42	0.943961	0.206723	4.5663	4.96e-06	0.00101757	464.671	448.864	487.017	977.572	662.295	1054.1	Crip2	cysteine rich protein 2	68337	1397	CRIP2
ENSMUSG00000020439	70.271	1.87871	0.413586	4.5425	5.56e-06	0.00111072	50.8834	23.7688	15.0385	129.941	90.6298	111.364	Smtn	smoothelin	29856	6525	SMTN
ENSMUSG00000053137	311.912	-0.873373	0.192244	-4.54304	5.54e-06	0.00111072	427.229	414.125	369.022	215.135	232.052	213.908	Mapk11	mitogen-activated protein kinase 11	19094	5600	MAPK11
ENSMUSG00000004709	232.167	1.17896	0.259843	4.53722	5.7e-06	0.00112463	130.569	191.064	104.113	324.423	277.865	364.966	Cd244a	CD244 molecule A	18106	51744	CD244
ENSMUSG00000024791	104.578	1.76997	0.39075	4.52967	5.91e-06	0.00115117	77.7652	37.4815	26.6066	208.25	107.561	169.803	Cdca5	cell division cycle associated 5	67849	113130	CDCA5
ENSMUSG00000027858	190.394	1.32152	0.292419	4.51925	6.21e-06	0.00119454	103.687	85.9332	137.66	345.937	180.264	288.886	Tspan2	tetraspanin 2	70747	10100	TSPAN2
ENSMUSG00000078439	288.405	0.907397	0.201438	4.50461	6.65e-06	0.00126455	227.535	195.635	178.149	384.661	358.536	385.916	Smim24	small integral membrane protein 24	72273	284422	SMIM24
ENSMUSG00000042029	65.2756	1.61695	0.360109	4.49015	7.12e-06	0.00133737	31.6821	31.0822	33.5475	104.125	67.7234	123.493	Ncapg2	non-SMC condensin II complex, subunit G2	76044	54892	NCAPG2
ENSMUSG00000072082	132.804	2.03599	0.454595	4.47869	7.51e-06	0.00139464	88.3259	22.8546	45.1156	320.981	94.6136	224.934	Ccnf	cyclin F	12449	899	CCNF
ENSMUSG00000031760	97.7832	1.31034	0.29428	4.4527	8.48e-06	0.00155631	56.6438	53.0226	58.9973	146.292	108.557	163.187	Mt3	metallothionein 3	17751	4504	MT3
ENSMUSG00000039396	89.9513	2.0636	0.464582	4.44183	8.92e-06	0.00161822	51.8435	20.112	32.3907	240.09	60.7519	134.519	Neil3	nei like 3 (E. coli)	234258	55247	NEIL3
ENSMUSG00000069910	31.1926	2.60735	0.588928	4.42729	9.54e-06	0.0017116	14.401	8.22765	3.47043	75.7274	26.8902	58.4387	Spdl1	spindle apparatus coiled-coil protein 1	70385	54908	SPDL1
ENSMUSG00000034773	14.6186	4.83077	1.0957	4.40885	1.04e-05	0.00184304	2.88019	0	0	26.6767	12.9471	45.2073	Hrob	homologous recombination factor with OB-fold	217216	78995	HROB
ENSMUSG00000020089	779.374	-0.711028	0.161672	-4.39798	1.09e-05	0.00191625	934.142	1046.74	921.977	613.564	577.641	582.182	Ppa1	pyrophosphatase (inorganic) 1	67895	5464	PPA1
ENSMUSG00000038402	7.89875	6.42135	1.46123	4.39447	1.11e-05	0.00192602	0	0	0	24.0951	8.96339	14.334	Foxf2	forkhead box F2	14238	2295	FOXF2
ENSMUSG00000008393	702.448	1.00156	0.228733	4.37874	1.19e-05	0.0020479	496.353	440.636	467.351	1239.18	659.307	911.864	Carhsp1	calcium regulated heat stable protein 1	52502	23589	CARHSP1
ENSMUSG00000026478	198.348	1.04054	0.237768	4.37627	1.21e-05	0.00204898	163.211	112.445	113.367	273.651	253.963	273.449	Lamc1	laminin, gamma 1	226519	3915	LAMC1
ENSMUSG00000044447	923.376	0.858377	0.196731	4.36319	1.28e-05	0.0021523	667.245	507.372	795.885	1121.28	1167.23	1281.24	Dock5	dedicator of cytokinesis 5	68813	80005	DOCK5
ENSMUSG00000040204	599.812	2.68637	0.616115	4.36017	1.3e-05	0.00215923	264.018	117.93	101.799	1420.75	456.137	1238.24	Pclaf	PCNA clamp associated factor	68026	9768	PCLAF
ENSMUSG00000020185	44.0985	2.07538	0.477188	4.34918	1.37e-05	0.00224667	17.2812	18.2837	15.0385	80.8907	33.8617	99.2355	E2f7	E2F transcription factor 7	52679	144455	E2F7
ENSMUSG00000026068	6511.59	0.654542	0.150815	4.34004	1.42e-05	0.00231805	4939.53	5095.66	5143.18	8902.28	7102.99	7885.92	Il18rap	interleukin 18 receptor accessory protein	16174	8807	IL18RAP
ENSMUSG00000053063	18.1137	4.08028	0.941126	4.33553	1.45e-05	0.00234197	0	2.74255	3.47043	70.5642	10.9553	20.9497	Clec12a	C-type lectin domain family 12, member a	232413	160364	CLEC12A
ENSMUSG00000061615	32.1953	2.46538	0.570686	4.32003	1.56e-05	0.00248727	15.361	8.22765	5.78405	58.5167	25.8942	79.3884	H2ac4	H2A clustered histone 4	319172	3012	H2AC8
ENSMUSG00000076858	50.0264	2.51409	0.583266	4.31037	1.63e-05	0.00257256	20.1613	17.3695	6.94086	122.197	112.54	20.9497	Trav3-4	T cell receptor alpha variable 3-4	NA	NA	TRAV5
ENSMUSG00000035863	193.554	1.31571	0.306022	4.29941	1.71e-05	0.00267634	167.051	77.7056	87.9175	329.586	220.101	278.962	Palm	paralemmin	18483	5064	PALM
ENSMUSG00000005470	628.341	1.26596	0.295282	4.28731	1.81e-05	0.00279861	507.874	300.766	298.457	1185.82	507.925	969.2	Asf1b	anti-silencing function 1B histone chaperone	66929	55723	ASF1B
ENSMUSG00000031765	390.368	0.899374	0.210379	4.27501	1.91e-05	0.00292887	253.457	265.113	299.614	610.122	413.312	500.588	Mt1	metallothionein 1	17748	4489	MT1A
ENSMUSG00000112230	578.935	-1.05677	0.247414	-4.27124	1.94e-05	0.00295017	693.166	863.903	787.787	233.206	461.117	434.431	Ifngas1	Ifng antisense RNA 1	NA	NA	NA
ENSMUSG00000037313	420.573	1.21349	0.284801	4.26082	2.04e-05	0.00306174	334.102	266.027	159.64	799.441	458.129	506.101	Tacc3	transforming, acidic coiled-coil containing protein 3	21335	10460	TACC3
ENSMUSG00000056054	18.0341	-5.18652	1.22754	-4.22513	2.39e-05	0.0035559	54.7237	0.914183	49.7428	1.72108	0	1.10262	S100a8	S100 calcium binding protein A8 (calgranulin A)	20201	6279	S100A8
ENSMUSG00000034853	124.069	1.07647	0.255135	4.21921	2.45e-05	0.00361643	86.4058	73.1347	79.8199	157.479	162.337	185.24	Acot11	acyl-CoA thioesterase 11	329910	26027	ACOT11
ENSMUSG00000030844	390.278	-0.841105	0.19985	-4.20868	2.57e-05	0.00375399	558.757	490.917	452.313	236.648	309.735	293.296	Rgs10	regulator of G-protein signalling 10	67865	6001	RGS10
ENSMUSG00000025915	126.35	-1.0994	0.261397	-4.20587	2.6e-05	0.00376609	159.371	201.12	156.169	75.7274	89.6339	76.0806	Sgk3	serum/glucocorticoid regulated kinase 3	170755	100533105	C8orf44-SGK3
ENSMUSG00000026888	16.7452	3.39328	0.809309	4.19281	2.76e-05	0.00391777	5.76038	2.74255	0	47.3297	25.8942	18.7445	Grb14	growth factor receptor bound protein 14	50915	2888	GRB14
ENSMUSG00000050989	273.299	1.09492	0.261039	4.19445	2.74e-05	0.00391777	231.375	125.243	166.581	451.783	319.694	345.119	Selenon	selenoprotein N	74777	57190	SELENON
ENSMUSG00000034883	28.9773	3.09398	0.740719	4.177	2.95e-05	0.00412595	10.5607	7.31347	0	82.6118	14.939	58.4387	Lrr1	leucine rich repeat protein 1	69706	122769	LRR1
ENSMUSG00000044734	178.784	1.40822	0.337066	4.17786	2.94e-05	0.00412595	123.848	83.1907	86.7607	411.338	171.3	196.266	Serpinb1a	serine (or cysteine) peptidase inhibitor, clade B, member 1a	66222	1992	SERPINB1
ENSMUSG00000029121	369.21	1.15532	0.276852	4.17306	3.01e-05	0.0041543	303.38	168.21	215.167	694.455	376.462	457.586	Crmp1	collapsin response mediator protein 1	12933	1400	CRMP1
ENSMUSG00000033486	42.6962	-1.70888	0.409661	-4.17144	3.03e-05	0.0041543	71.0447	68.5638	56.6837	20.6529	24.8983	14.334	Catsper2	cation channel, sperm associated 2	212670	117155	CATSPER2
ENSMUSG00000068220	54211.6	0.711055	0.17069	4.16576	3.1e-05	0.0042224	45245.9	38303.4	39798.9	71946.2	54689.6	75285.6	Lgals1	lectin, galactose binding, soluble 1	16852	3956	LGALS1
ENSMUSG00000040084	90.7641	2.02448	0.487125	4.15598	3.24e-05	0.0043695	55.6837	22.8546	28.9202	238.369	48.8007	149.956	Bub1b	BUB1B, mitotic checkpoint serine/threonine kinase	12236	701	BUB1B
ENSMUSG00000039959	673.108	0.903381	0.217774	4.14824	3.35e-05	0.00448151	538.596	362.931	505.526	783.951	764.876	1082.77	Hip1	huntingtin interacting protein 1	215114	3092	HIP1
ENSMUSG00000018451	158.688	1.25299	0.30289	4.13678	3.52e-05	0.00467172	120.008	90.5042	70.5654	281.396	150.386	239.268	6330403K07Rik	RIKEN cDNA 6330403K07 gene	103712	728392	NA
ENSMUSG00000033350	56.9757	2.22302	0.538501	4.12816	3.66e-05	0.00480982	42.2428	11.8844	5.78405	118.754	61.7478	101.441	Chst2	carbohydrate sulfotransferase 2	54371	9435	CHST2
ENSMUSG00000057329	3506.33	-0.830765	0.201589	-4.12107	3.77e-05	0.00491927	3817.22	5057.26	4591.38	1914.7	3099.34	2558.07	Bcl2	B cell leukemia/lymphoma 2	12043	596	BCL2
ENSMUSG00000034906	129.366	1.63992	0.398423	4.11602	3.85e-05	0.00498704	86.4058	41.1383	61.3109	319.26	101.585	166.495	Ncaph	non-SMC condensin I complex, subunit H	215387	23397	NCAPH
ENSMUSG00000003992	682.938	-0.660182	0.160579	-4.11125	3.94e-05	0.00504984	822.775	863.903	822.492	510.3	526.848	551.308	Ssbp2	single-stranded DNA binding protein 2	66970	23635	SSBP2
ENSMUSG00000024660	596.322	0.776922	0.189083	4.1089	3.98e-05	0.00506031	475.232	422.353	421.079	859.679	624.45	775.14	Incenp	inner centromere protein	16319	3619	INCENP
ENSMUSG00000000244	2650.78	0.819736	0.199748	4.10385	4.06e-05	0.00513081	2444.32	1598.91	1708.61	3794.12	2893.18	3465.52	Tspan32	tetraspanin 32	27027	10077	TSPAN32
ENSMUSG00000027379	35.7784	2.44751	0.598804	4.08734	4.36e-05	0.00546615	20.1613	8.22765	4.62724	89.4961	24.8983	67.2596	Bub1	BUB1, mitotic checkpoint serine/threonine kinase	12235	699	BUB1
ENSMUSG00000072721	55.4959	1.81845	0.445833	4.07878	4.53e-05	0.00562659	20.1613	34.739	18.509	135.965	60.7519	62.8492	Klra14-ps	killer cell lectin-like receptor subfamily A, member 14, pseudogene	NA	NA	NA
ENSMUSG00000024675	1571.23	-0.831557	0.204917	-4.05803	4.95e-05	0.00610264	1980.61	2543.26	1510.79	1016.3	1212.05	1164.36	Ms4a4c	membrane-spanning 4-domains, subfamily A, member 4C	64380	51338	MS4A4A
ENSMUSG00000068105	217.241	1.48725	0.366802	4.05464	5.02e-05	0.0061436	145.93	127.072	69.4086	529.232	189.227	242.576	Tnfrsf13c	tumor necrosis factor receptor superfamily, member 13c	72049	115650	TNFRSF13C
ENSMUSG00000027669	179.28	1.17225	0.289579	4.04811	5.16e-05	0.00626892	116.168	110.616	104.113	357.124	179.268	208.395	Gnb4	guanine nucleotide binding protein (G protein), beta 4	14696	59345	GNB4
ENSMUSG00000078926	167.902	1.40376	0.347426	4.04045	5.33e-05	0.00642785	72.0048	143.527	60.1541	316.678	160.345	254.704	Cdc20b	cell division cycle 20B	238896	166979	CDC20B
ENSMUSG00000029994	730.727	0.983535	0.243904	4.03247	5.52e-05	0.00659977	500.193	596.048	375.963	1302.86	745.953	863.349	Anxa4	annexin A4	11746	307	ANXA4
ENSMUSG00000020399	325.375	1.12677	0.280112	4.02257	5.76e-05	0.00678084	245.776	211.176	156.169	644.544	350.568	344.016	Havcr2	hepatitis A virus cellular receptor 2	171285	84868	HAVCR2
ENSMUSG00000021485	240.185	2.69035	0.668769	4.02283	5.75e-05	0.00678084	120.008	33.8248	39.3315	460.388	234.044	553.514	Mxd3	Max dimerization protein 3	17121	83463	MXD3
ENSMUSG00000108090	1059.78	1.13588	0.283323	4.00912	6.09e-05	0.00712578	941.823	674.667	371.336	1838.97	1150.3	1381.58	Gm6637	predicted gene 6637	NA	NA	NA
ENSMUSG00000050410	834.554	0.865002	0.216401	3.99721	6.41e-05	0.00743858	673.965	514.685	586.503	1316.62	789.774	1125.77	Tcf19	transcription factor 19	106795	6941	TCF19
ENSMUSG00000054932	94.2105	-1.1877	0.29809	-3.98439	6.77e-05	0.00779458	115.208	162.725	114.524	55.0745	53.7803	63.9518	Afp	alpha fetoprotein	11576	174	AFP
ENSMUSG00000004933	1948.49	0.87208	0.219068	3.98087	6.87e-05	0.00785343	1121.35	1502.92	1507.32	3327.7	2276.7	1954.94	Matk	megakaryocyte-associated tyrosine kinase	17179	4145	MATK
ENSMUSG00000027074	194.965	1.07301	0.270709	3.96369	7.38e-05	0.00838046	121.928	123.415	131.876	337.331	176.28	278.962	Slc43a3	solute carrier family 43, member 3	58207	29015	SLC43A3
ENSMUSG00000030107	721.056	-0.836049	0.211137	-3.95974	7.5e-05	0.0084593	910.141	897.728	964.779	401.011	675.242	477.433	Usp18	ubiquitin specific peptidase 18	24110	11274	USP18
ENSMUSG00000019564	142.628	1.16398	0.294731	3.9493	7.84e-05	0.00877394	107.527	53.0226	104.113	207.39	185.243	198.471	Arid3a	AT rich interactive domain 3A (BRIGHT-like)	13496	1820	ARID3A
ENSMUSG00000036721	201.087	-0.940713	0.239779	-3.92325	8.74e-05	0.00971094	248.657	298.024	246.4	123.057	171.3	119.083	Zscan12	zinc finger and SCAN domain containing 12	22758	9753	ZSCAN12
ENSMUSG00000015981	167.598	1.18092	0.301229	3.92034	8.84e-05	0.00975999	119.048	65.8212	123.779	302.91	202.174	191.855	Stk32c	serine/threonine kinase 32C	57740	282974	STK32C
ENSMUSG00000028362	307.13	-1.08398	0.27695	-3.91401	9.08e-05	0.00995016	302.42	468.062	481.233	131.662	260.934	198.471	Tnfsf8	tumor necrosis factor (ligand) superfamily, member 8	21949	944	TNFSF8
ENSMUSG00000022441	61.0798	1.77743	0.458283	3.87845	0.000105126	0.0113196	38.4026	35.6532	8.09767	123.057	79.6746	81.5936	Efcab6	EF-hand calcium binding domain 6	77627	64800	EFCAB6
ENSMUSG00000040694	433.104	0.886763	0.228627	3.87864	0.000105042	0.0113196	333.142	325.449	253.341	718.55	442.194	525.948	Apobec2	apolipoprotein B mRNA editing enzyme, catalytic polypeptide 2	11811	10930	APOBEC2
ENSMUSG00000051378	62.3014	2.3391	0.603209	3.87776	0.000105422	0.0113196	42.2428	5.4851	13.8817	139.407	33.8617	138.93	Kif18b	kinesin family member 18B	70218	146909	KIF18B
ENSMUSG00000022440	45.2256	1.57384	0.406821	3.86862	0.000109452	0.011673	28.8019	17.3695	21.9794	57.6561	61.7478	83.7989	C1qtnf6	C1q and tumor necrosis factor related protein 6	72709	114904	C1QTNF6
ENSMUSG00000017897	387.356	-0.751712	0.194555	-3.86376	0.000111656	0.0118105	544.356	424.181	489.33	261.604	304.755	299.912	Eya2	EYA transcriptional coactivator and phosphatase 2	14049	2139	EYA2
ENSMUSG00000034958	31.467	1.83822	0.475915	3.86249	0.000112238	0.0118105	13.4409	11.8844	16.1953	61.0983	49.7966	36.3864	Atcay	ataxia, cerebellar, Cayman type	16467	85300	ATCAY
ENSMUSG00000042284	1126.4	0.582257	0.151235	3.85001	0.000118114	0.0123464	940.863	852.933	912.723	1349.33	1327.58	1374.96	Itga1	integrin alpha 1	109700	3672	ITGA1
ENSMUSG00000039787	545.743	0.883276	0.229935	3.84141	0.000122331	0.0127032	400.347	350.132	401.413	951.756	536.808	634.005	Cercam	cerebral endothelial cell adhesion molecule	99151	51148	CERCAM
ENSMUSG00000051457	6878.37	0.644936	0.168099	3.83666	0.000124721	0.0128666	5307.23	4774.78	6016.57	8157.05	7389.82	9624.74	Spn	sialophorin	20737	6693	SPN
ENSMUSG00000095574	3716.94	-0.872853	0.227976	-3.8287	0.000128821	0.0132033	4740.8	6469.68	3213.62	2548.06	2918.08	2411.42	Trbv12-1	T cell receptor beta, variable 12-1	NA	NA	TRBV13
ENSMUSG00000028551	611.436	0.862958	0.225611	3.82498	0.000130782	0.0132924	483.872	487.26	329.691	944.872	612.498	810.423	Cdkn2c	cyclin dependent kinase inhibitor 2C	12580	1031	CDKN2C
ENSMUSG00000079685	84.2093	1.17686	0.307768	3.82387	0.000131375	0.0132924	62.4042	38.3957	54.3701	117.894	117.52	114.672	Ulbp1	UL16 binding protein 1	77777	79465	ULBP3
ENSMUSG00000046179	28.2053	2.52457	0.661474	3.81658	0.000135315	0.0135178	15.361	2.74255	6.94086	56.7956	17.9268	69.4649	E2f8	E2F transcription factor 8	108961	79733	E2F8
ENSMUSG00000051354	1827.84	-0.796919	0.20878	-3.81702	0.000135071	0.0135178	2280.15	2971.1	1708.61	1257.25	1481.95	1268.01	Samd3	sterile alpha motif domain containing 3	268288	154075	SAMD3
ENSMUSG00000039208	1042.64	0.866973	0.228485	3.79445	0.000147971	0.0146892	917.821	552.167	746.142	1675.47	1294.71	1069.54	Metrnl	meteorin, glial cell differentiation regulator-like	210029	284207	METRNL
ENSMUSG00000022330	25.3479	3.13692	0.832377	3.76863	0.000164148	0.0161932	12.4808	2.74255	0	12.9081	36.8495	87.1067	Osr2	odd-skipped related 2	107587	116039	OSR2
ENSMUSG00000035283	101.591	1.20022	0.318768	3.76519	0.000166426	0.0163159	53.7636	43.8808	87.9175	124.778	140.426	158.777	Adrb1	adrenergic receptor, beta 1	11554	153	ADRB1
ENSMUSG00000031004	372.523	2.69796	0.717476	3.76035	0.000169676	0.0165319	191.053	40.2241	67.095	717.69	374.471	844.604	Mki67	antigen identified by monoclonal antibody Ki 67	17345	4288	MKI67
ENSMUSG00000022018	1410.92	0.696312	0.185367	3.7564	0.000172374	0.0165427	959.104	1141.82	1130.2	2020.55	1402.27	1811.6	Rgcc	regulator of cell cycle	66214	28984	RGCC
ENSMUSG00000033031	67.1541	1.48604	0.39567	3.75577	0.000172809	0.0165427	51.8435	21.9404	32.3907	133.384	80.6705	82.6963	Cip2a	cell proliferation regulating inhibitor of protein phosphatase 2A	224171	57650	CIP2A
ENSMUSG00000078922	187.277	-0.978181	0.26046	-3.75559	0.000172931	0.0165427	236.176	313.565	195.501	147.152	105.569	125.698	Tgtp1	T cell specific GTPase 1	21822	NA	NA
ENSMUSG00000100170	74.4087	-1.51962	0.404927	-3.75284	0.000174845	0.016625	97.9265	124.329	108.74	26.6767	66.7275	22.0523	Gm28942	predicted gene 28942	NA	NA	NA
ENSMUSG00000074217	73.5757	1.61466	0.434038	3.72009	0.000199154	0.018823	57.6038	36.5673	13.8817	126.499	75.6909	131.211	Misp3	MISP family member 3	70134	113230	MISP3
ENSMUSG00000001865	49.3293	-1.44655	0.389364	-3.71516	0.000203074	0.0190404	57.6038	72.2205	86.7607	22.374	33.8617	23.155	Cpa3	carboxypeptidase A3, mast cell	12873	1359	CPA3
ENSMUSG00000021760	106.726	1.5512	0.417644	3.71418	0.000203866	0.0190404	24.0016	77.7056	61.3109	214.274	86.6461	176.419	Gpx8	glutathione peroxidase 8 (putative)	69590	493869	GPX8
ENSMUSG00000034311	43.9405	1.95907	0.528347	3.70793	0.00020896	0.0194014	35.5224	10.056	8.09767	89.4961	48.8007	71.6701	Kif4	kinesin family member 4	16571	24137	KIF4A
ENSMUSG00000030189	4013.97	0.689163	0.186302	3.69917	0.000216307	0.019966	3467.75	2780.03	2971.84	5985.91	3993.69	4884.59	Ybx3	Y box protein 3	56449	8531	YBX3
ENSMUSG00000078521	25.2554	2.75979	0.746504	3.69695	0.000218204	0.020024	16.3211	1.82837	1.15681	68.8431	25.8942	37.489	Aunip	aurora kinase A and ninein interacting protein	69885	79000	AUNIP
ENSMUSG00000026765	110.402	-1.36532	0.370127	-3.68877	0.000225338	0.0204904	133.449	222.147	121.465	49.0507	96.6054	39.6942	Lypd6b	LY6/PLAUR domain containing 6B	71897	130576	LYPD6B
ENSMUSG00000053113	291.373	-1.11009	0.301106	-3.6867	0.000227181	0.0204904	590.439	229.46	374.806	166.084	212.134	175.316	Socs3	suppressor of cytokine signaling 3	12702	9021	SOCS3
ENSMUSG00000117245	10.1998	3.87625	1.05128	3.68718	0.00022675	0.0204904	1.92013	1.82837	0	27.5373	8.96339	20.9497	Gm49887	predicted gene, 49887	NA	NA	NA
ENSMUSG00000026669	40.4753	2.0341	0.553132	3.67742	0.000235601	0.0211242	24.9617	5.4851	17.3521	74.8669	30.8739	89.312	Mcm10	minichromosome maintenance 10 replication initiation factor	70024	55388	MCM10
ENSMUSG00000051615	757.315	0.689732	0.187629	3.67604	0.000236885	0.0211242	652.844	498.23	587.659	844.189	880.404	1080.56	Rap2a	RAS related protein 2a	76108	5911	RAP2A
ENSMUSG00000022033	73.776	1.95943	0.533496	3.67281	0.0002399	0.021273	41.2828	38.3957	10.4113	178.992	36.8495	136.724	Pbk	PDZ binding kinase	52033	55872	PBK
ENSMUSG00000002055	67.1233	1.52965	0.417334	3.6653	0.00024705	0.0217846	48.0032	31.0822	24.293	130.802	52.7844	115.775	Spag5	sperm associated antigen 5	54141	10615	SPAG5
ENSMUSG00000028069	624.279	-0.644608	0.176339	-3.6555	0.000256679	0.0225079	707.567	789.855	786.631	430.27	541.787	489.562	Gpatch4	G patch domain containing 4	66614	54865	GPATCH4
ENSMUSG00000006310	625.41	0.97648	0.268183	3.64109	0.000271483	0.0227931	619.241	333.677	311.182	1000.81	647.356	840.194	Zbtb32	zinc finger and BTB domain containing 32	58206	27033	ZBTB32
ENSMUSG00000015437	17278.9	0.859723	0.235562	3.64966	0.000262585	0.0227931	13588.7	13405.6	9838.67	31603.3	17037.4	18199.8	Gzmb	granzyme B	14939	3002	GZMB
ENSMUSG00000017499	58.9552	1.65064	0.453089	3.64309	0.000269389	0.0227931	38.4026	28.3397	18.509	134.244	43.821	90.4146	Cdc6	cell division cycle 6	23834	990	CDC6
ENSMUSG00000020401	579.458	0.708423	0.194306	3.64592	0.000266436	0.0227931	504.994	371.158	444.215	803.744	630.425	722.214	Fam71b	family with sequence similarity 71, member B	432552	153745	FAM71B
ENSMUSG00000030410	23.4507	2.70882	0.743318	3.64423	0.000268196	0.0227931	14.401	1.82837	2.31362	64.5404	17.9268	39.6942	Dmwd	dystrophia myotonica-containing WD repeat motif	13401	1762	DMWD
ENSMUSG00000036768	118.544	1.28797	0.353676	3.64167	0.000270873	0.0227931	79.6853	76.7914	49.7428	204.808	89.6339	210.6	Kif15	kinesin family member 15	209737	56992	KIF15
ENSMUSG00000042082	615.845	0.718948	0.197137	3.64694	0.000265379	0.0227931	515.554	456.178	424.549	869.145	611.502	818.142	Arsb	arylsulfatase B	11881	411	ARSB
ENSMUSG00000062995	28.0261	2.12979	0.584647	3.64287	0.000269614	0.0227931	20.1613	7.31347	3.47043	47.3297	35.8536	54.0282	Ica1	islet cell autoantigen 1	15893	3382	ICA1
ENSMUSG00000027500	21.0649	3.06834	0.843165	3.63907	0.000273623	0.0228512	7.68051	5.4851	0	45.6086	6.97153	60.6439	Stmn2	stathmin-like 2	20257	11075	STMN2
ENSMUSG00000030283	58.1169	-1.40449	0.386138	-3.63728	0.00027553	0.0228893	81.6055	106.959	64.7813	43.8875	23.9024	27.5654	St8sia1	ST8 alpha-N-acetyl-neuraminide alpha-2,8-sialyltransferase 1	20449	6489	ST8SIA1
ENSMUSG00000028229	376.21	-0.963686	0.265464	-3.6302	0.000283204	0.0234037	391.706	665.526	434.96	246.975	330.65	187.445	Rmdn1	regulator of microtubule dynamics 1	66302	51115	RMDN1
ENSMUSG00000094377	106.125	1.54313	0.42791	3.60621	0.000310699	0.025542	24.9617	64.907	72.879	77.4485	168.313	228.242	Gm24407	predicted gene, 24407	NA	NA	NA
ENSMUSG00000098318	378.303	0.920811	0.255748	3.60046	0.00031765	0.0259781	262.098	315.393	205.912	418.222	393.393	674.801	Lockd	lncRNA downstream of Cdkn1b	NA	NA	NA
ENSMUSG00000024059	31.1065	2.00438	0.557439	3.59569	0.000323533	0.0260543	8.64058	19.1979	9.25448	77.4485	26.8902	45.2073	Clip4	CAP-GLY domain containing linker protein family, member 4	78785	79745	CLIP4
ENSMUSG00000026811	89.8246	1.43486	0.398952	3.59657	0.000322435	0.0260543	80.6454	25.5971	39.3315	171.247	108.557	113.57	St6galnac6	ST6 (alpha-N-acetyl-neuraminyl-2,3-beta-galactosyl-1,3)-N-acetylgalactosaminide alpha-2,6-sialyltransferase 6	50935	30815	ST6GALNAC6
ENSMUSG00000039899	787.72	0.76805	0.213555	3.5965	0.000322528	0.0260543	581.799	624.387	542.544	1274.46	744.957	958.174	Fgl2	fibrinogen-like protein 2	14190	10875	FGL2
ENSMUSG00000054074	24.8105	2.04163	0.569739	3.58345	0.000339083	0.0271679	14.401	5.4851	9.25448	35.2821	55.7722	28.668	Skida1	SKI/DACH domain containing 1	72668	387640	SKIDA1
ENSMUSG00000029304	6.13173	6.04378	1.69271	3.57048	0.000356333	0.0284059	0	0	0	6.02377	0.995932	29.7707	Spp1	secreted phosphoprotein 1	20750	6696	SPP1
ENSMUSG00000047534	52.5934	1.79926	0.504158	3.56885	0.000358545	0.0284386	41.2828	22.8546	5.78405	102.404	62.7437	80.491	Mis18bp1	MIS18 binding protein 1	217653	55320	MIS18BP1
ENSMUSG00000006732	324.898	-0.958139	0.268582	-3.56739	0.00036055	0.0284546	391.706	382.129	512.467	135.105	258.942	269.039	Mettl1	methyltransferase like 1	17299	4234	METTL1
ENSMUSG00000059901	318.566	0.987066	0.277351	3.55891	0.000372393	0.029243	196.813	140.784	304.241	333.889	457.133	478.536	Adamts14	a disintegrin-like and metallopeptidase (reprolysin type) with thrombospondin type 1 motif, 14	237360	140766	ADAMTS14
ENSMUSG00000001305	772.239	-0.592133	0.166443	-3.55758	0.000374292	0.0292467	854.457	980.919	949.741	562.793	639.389	646.133	Rrp15	ribosomal RNA processing 15 homolog (S. cerevisiae)	67223	51018	RRP15
ENSMUSG00000030729	444.193	0.688474	0.193693	3.55446	0.000378753	0.0294494	345.623	302.595	372.493	519.766	493.982	630.697	Pgm2l1	phosphoglucomutase 2-like 1	70974	283209	PGM2L1
ENSMUSG00000061577	1198.63	-0.644257	0.181454	-3.55052	0.000384465	0.029747	1466.02	1304.54	1614.91	889.797	811.685	1104.82	Adgrg5	adhesion G protein-coupled receptor G5	382045	221188	ADGRG5
ENSMUSG00000026728	17339.7	0.681675	0.192504	3.5411	0.000398467	0.03068	14144.6	12777.5	13031.5	26082.9	15767.6	22234.3	Vim	vimentin	22352	7431	VIM
ENSMUSG00000040276	181.49	-0.978248	0.276843	-3.53358	0.000409975	0.0312611	256.337	185.579	279.948	85.1934	137.439	144.443	Pacsin1	protein kinase C and casein kinase substrate in neurons 1	23969	29993	PACSIN1
ENSMUSG00000091351	6.88042	5.22898	1.47935	3.53465	0.000408315	0.0312611	0.960064	0	0	20.6529	11.9512	7.71832	Gm17135	predicted gene 17135	NA	NA	NA
ENSMUSG00000005233	221.066	1.1793	0.335832	3.51158	0.000445452	0.0338029	162.251	159.068	84.4471	418.222	168.313	334.093	Spc25	SPC25, NDC80 kinetochore complex component, homolog (S. cerevisiae)	66442	57405	SPC25
ENSMUSG00000027715	270.675	2.70867	0.772261	3.50745	0.00045242	0.0340048	134.409	39.3099	41.6451	683.268	186.239	539.18	Ccna2	cyclin A2	12428	890	CCNA2
ENSMUSG00000027907	6982.83	0.562206	0.160265	3.50798	0.00045153	0.0340048	5591.41	5628.63	5697.29	8254.29	7114.94	9610.41	S100a11	S100 calcium binding protein A11	20195	6282	S100A11
ENSMUSG00000027994	415.766	0.719182	0.2055	3.49967	0.000465842	0.0348477	310.101	330.934	301.927	633.357	434.227	484.049	Mcub	mitochondrial calcium uniporter dominant negative beta subunit	66815	55013	MCUB
ENSMUSG00000041272	139.903	-0.860196	0.245891	-3.49829	0.000468256	0.034863	192.013	176.437	172.365	85.1934	107.561	105.851	Tox	thymocyte selection-associated high mobility group box	252838	9760	TOX
ENSMUSG00000027533	116.023	0.994147	0.284364	3.49604	0.000472221	0.0349931	75.8451	95.9893	60.1541	153.176	133.455	177.521	Fabp5	fatty acid binding protein 5, epidermal	16592	2171	FABP5
ENSMUSG00000028445	21.0772	2.45687	0.7042	3.48888	0.000485047	0.0357756	0.960064	13.7128	4.62724	48.1902	25.8942	33.0785	Enho	energy homeostasis associated	69638	375704	ENHO
ENSMUSG00000048965	46.1693	2.01731	0.579607	3.48049	0.000500506	0.0367441	28.8019	21.0262	4.62724	107.567	27.8861	87.1067	Mrgpre	MAS-related GPR, member E	244238	116534	MRGPRE
ENSMUSG00000074570	17.0431	2.27043	0.653843	3.47243	0.000515761	0.0376887	7.68051	7.31347	2.31362	32.7005	26.8902	25.3602	Cass4	Cas scaffolding protein family member 4	320664	57091	CASS4
ENSMUSG00000049410	209.733	0.970255	0.280216	3.46253	0.000535118	0.0389231	190.093	120.672	114.524	362.287	246.991	223.831	Zfp683	zinc finger protein 683	NA	NA	NA
ENSMUSG00000055407	76.1033	1.46803	0.424445	3.45871	0.000542763	0.039298	54.7237	42.0524	24.293	181.574	75.6909	78.2858	Map6	microtubule-associated protein 6	17760	4135	MAP6
ENSMUSG00000028214	665.664	0.867976	0.251113	3.45651	0.00054721	0.0393588	562.598	548.51	301.927	1072.23	768.86	739.856	Gem	GTP binding protein (gene overexpressed in skeletal muscle)	14579	2669	GEM
ENSMUSG00000035960	168.496	-0.775128	0.224295	-3.45584	0.000548589	0.0393588	204.494	204.777	229.048	124.778	125.487	122.39	Apex1	apurinic/apyrimidinic endonuclease 1	11792	328	APEX1
ENSMUSG00000019992	12.9631	3.2326	0.935874	3.4541	0.00055214	0.0394343	0.960064	0	6.94086	29.2583	11.9512	28.668	Mtfr2	mitochondrial fission regulator 2	71804	113115	MTFR2
ENSMUSG00000049916	84.664	1.14279	0.331236	3.45006	0.000560454	0.0398478	59.524	50.2801	48.586	149.734	79.6746	120.185	2610318N02Rik	RIKEN cDNA 2610318N02 gene	70458	NA	NA
ENSMUSG00000037725	90.5359	1.3079	0.379833	3.44336	0.00057453	0.0406654	69.1246	51.1943	35.8611	197.063	89.6339	100.338	Ckap2	cytoskeleton associated protein 2	80986	26586	CKAP2
ENSMUSG00000105139	106.901	0.983096	0.28586	3.43908	0.0005837	0.04113	64.3243	84.1049	67.095	171.247	134.451	120.185	Gm19391	predicted gene, 19391	NA	NA	NA
ENSMUSG00000035919	288.361	-0.725984	0.21196	-3.42509	0.000614594	0.0429485	363.864	314.479	400.256	202.227	251.971	197.368	Bbs9	Bardet-Biedl syndrome 9 (human)	319845	27241	BBS9
ENSMUSG00000056737	3569.72	0.844075	0.246478	3.42454	0.000615839	0.0429485	2357.92	3258.15	2046.4	6243.21	3155.11	4357.54	Capg	capping protein (actin filament), gelsolin-like	12332	822	CAPG
ENSMUSG00000102212	372.403	-0.859906	0.25116	-3.42373	0.00061767	0.0429485	456.03	459.834	524.035	166.945	327.662	299.912	C230085N15Rik	RIKEN cDNA C230085N15 gene	NA	NA	NA
ENSMUSG00000022500	509.805	0.793483	0.231875	3.42203	0.000621564	0.0430297	469.471	292.539	357.454	789.114	522.864	627.389	Litaf	LPS-induced TN factor	56722	9516	LITAF
ENSMUSG00000053080	14.926	2.50913	0.734285	3.4171	0.000632921	0.0436245	5.76038	0.914183	6.94086	22.374	24.8983	28.668	2700081O15Rik	RIKEN cDNA 2700081O15 gene	108899	65998	C11orf95
ENSMUSG00000096243	132.192	1.27862	0.374326	3.41579	0.000635978	0.0436447	41.2828	98.7318	91.388	104.125	226.077	231.55	Gm24265	predicted gene, 24265	NA	NA	NA
ENSMUSG00000033952	67.6851	1.24815	0.365932	3.41088	0.000647545	0.0442461	48.9633	31.0822	40.4883	123.918	65.7315	95.9277	Aspm	abnormal spindle microtubule assembly	12316	259266	ASPM
ENSMUSG00000038943	162.634	1.18436	0.348605	3.39743	0.000680225	0.0462788	144.97	95.0751	57.8405	321.842	196.199	159.879	Prc1	protein regulator of cytokinesis 1	233406	9055	PRC1
ENSMUSG00000049858	648.496	0.837183	0.2467	3.39353	0.000689975	0.0467406	535.716	506.458	353.984	1136.77	662.295	695.751	Suox	sulfite oxidase	211389	6821	SUOX
ENSMUSG00000046949	574.241	0.68683	0.202504	3.39169	0.000694641	0.0468556	432.989	498.23	388.688	829.56	572.661	723.317	Nqo2	N-ribosyldihydronicotinamide quinone reductase 2	18105	4835	NQO2
ENSMUSG00000066363	134.513	-0.846594	0.24973	-3.39004	0.000698824	0.0469372	196.813	156.325	165.424	91.2172	103.577	93.7224	Serpina3f	serine (or cysteine) peptidase inhibitor, clade A, member 3F	238393	12	SERPINA3
ENSMUSG00000052013	334.308	-0.637694	0.188403	-3.38473	0.000712495	0.0476526	406.107	439.722	374.806	252.999	270.894	261.32	Btla	B and T lymphocyte associated	208154	151888	BTLA
ENSMUSG00000026594	132.801	-0.829059	0.245069	-3.38296	0.000717082	0.0477571	173.772	169.124	166.581	85.1934	99.5932	102.543	Ralgps2	Ral GEF with PH domain and SH3 binding motif 2	78255	55103	RALGPS2
ENSMUSG00000031373	1318.66	0.668512	0.197805	3.37966	0.000725764	0.0479308	1141.52	990.975	923.134	2007.64	1290.73	1558	Car5b	carbonic anhydrase 5b, mitochondrial	56078	11238	CA5B
ENSMUSG00000054717	6581.63	0.736844	0.21797	3.38048	0.000723587	0.0479308	5067.22	5743.81	3997.93	10272.3	5871.02	8537.56	Hmgb2	high mobility group box 2	97165	3148	HMGB2
ENSMUSG00000031391	465.252	0.643342	0.190532	3.37655	0.000734002	0.0482729	401.307	317.222	371.336	600.656	498.962	602.029	L1cam	L1 cell adhesion molecule	16728	3897	L1CAM
ENSMUSG00000018648	87.1004	1.38339	0.41029	3.37174	0.000746956	0.0485021	75.8451	42.0524	26.6066	178.132	78.6787	121.288	Dusp14	dual specificity phosphatase 14	56405	11072	DUSP14
ENSMUSG00000020897	179.587	2.58785	0.767049	3.37378	0.00074144	0.0485021	93.1262	42.9666	17.3521	449.201	147.398	327.477	Aurkb	aurora kinase B	20877	9212	AURKB
ENSMUSG00000027306	197.913	2.30385	0.683466	3.37083	0.000749413	0.0485021	121.928	37.4815	40.4883	517.184	189.227	281.167	Nusap1	nucleolar and spindle associated protein 1	108907	51203	NUSAP1
ENSMUSG00000042417	31.8597	1.64706	0.48864	3.3707	0.00074978	0.0485021	22.0815	14.6269	9.25448	40.4453	61.7478	43.0021	Ccno	cyclin O	218630	10309	CCNO
ENSMUSG00000017291	955.589	0.54546	0.162218	3.36252	0.000772355	0.0493557	775.732	747.802	807.453	1023.18	1143.33	1236.03	Taok1	TAO kinase 1	216965	57551	TAOK1
ENSMUSG00000026605	71.2743	1.82021	0.540996	3.36454	0.000766704	0.0493557	55.6837	30.1681	8.09767	167.805	46.8088	119.083	Cenpf	centromere protein F	108000	1063	CENPF
ENSMUSG00000061728	4.44625	-5.61204	1.66844	-3.36363	0.000769236	0.0493557	3.84026	5.4851	17.3521	0	0	0	Btnl7-ps	butyrophilin-like 7, pseudogene	NA	NA	NA
ENSMUSG00000061451	320.865	0.783155	0.233153	3.35898	0.0007823	0.0497896	288.979	191.064	227.892	491.368	346.584	379.3	Tmem151a	transmembrane protein 151A	381199	256472	TMEM151A
ENSMUSG00000029822	2441.2	0.554952	0.165307	3.3571	0.000787639	0.0499281	2078.54	2043.2	1810.41	3350.94	2584.44	2779.7	Osbpl3	oxysterol binding protein-like 3	71720	26031	OSBPL3
